# Supplementary material
Source: PubMed Central journal article supplement (PMC11460202)
Supplement: NIHMS1998831-supplement-Supplementary_file.pdf [file NIHMS1998831-supplement-Supplementary_file.pdf]

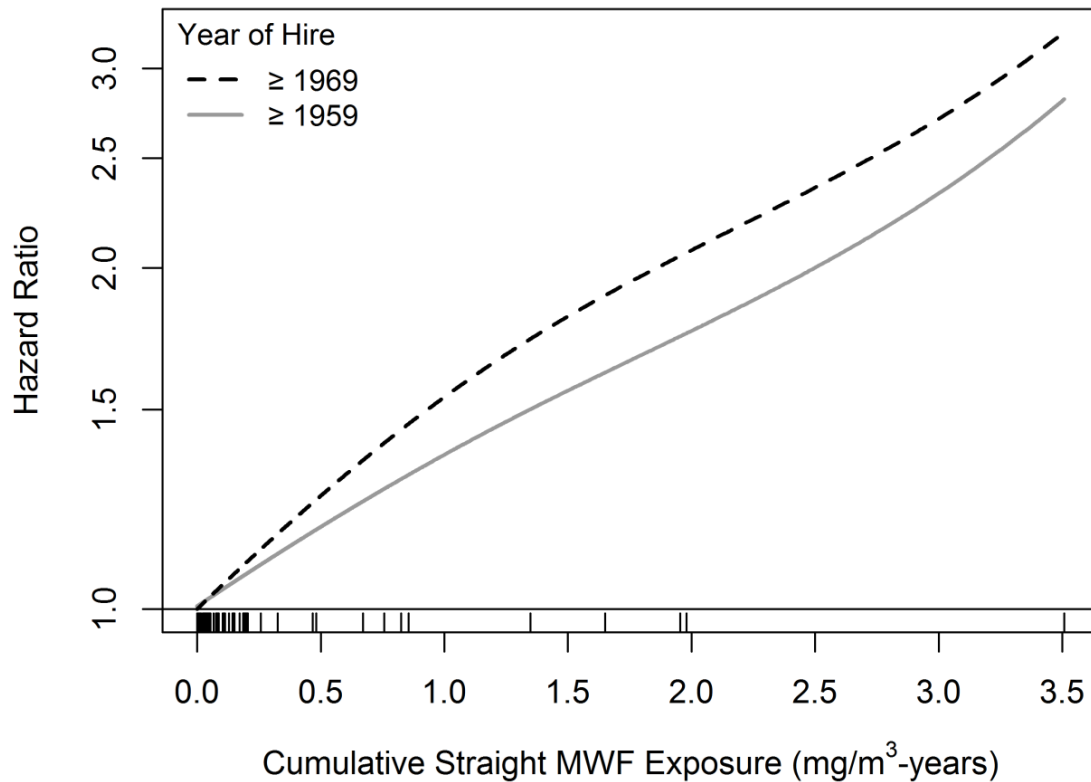

**Web Figure 1.** Adjusted hazard ratios for breast cancer incidence as a smoothed function of 20-year lagged cumulative straight metalworking fluid (MWF) as estimated in a Cox regression model using penalized splines (2 degrees of freedom) based on a cohort of female workers in the United Autoworker-General Motor incidence cohort who were alive in 1985, Michigan, 1985-2013. Model used age as the time scale and adjusted for cumulative exposure to straight and soluble MWF, year of hire, calendar year, race, and manufacturing plant. Results shown for the 1959 and 1969 year of hire restricted sub-cohorts. Graph truncated at the 99th percentile of synthetic fluid exposure among cases (0.60 mg/m<sup>3</sup>-years). The rug plot indicates exposure of the cases hired in 1959 or later.
